# Supplementary material for: Sequential solvent fractionation strategies modulate polyphenol distribution and antioxidant activity of Caryota mitis seed extracts
Source: Royal Society of Chemistry journal article supplement (doi:10.1039/d6ra02326f), 2026-05-26
Supplement: d6ra02326f1.pdf [file d6ra02326f1.pdf]

**Table S1.** Extraction and fractionation yields of *Caryota mitis* seed extracts

| <b>Workflow</b> | <b>Fraction/extract</b> | <b>Starting material</b> | <b>Fraction mass (g)</b> | <b>Yield from current step (%)</b> | <b>Overall yield from dry material (%)</b> |
|-----------------|-------------------------|--------------------------|--------------------------|------------------------------------|--------------------------------------------|
| A1              | A1-H                    | 100 g dry seed powder    | 0.1441                   | 0.1441                             | 0.1441                                     |
|                 | A1-EA                   | 100 g dry seed powder    | 0.3670                   | 0.3670                             | 0.3670                                     |
|                 | A1-M                    | 100 g dry seed powder    | 8.1384                   | 8.1384                             | 8.1384                                     |
| A2              | A2-HEa                  | 100 g dry seed powder    | 0.2834                   | 0.2834                             | 0.2834                                     |
|                 | A2-EA                   | 100 g dry seed powder    | 0.4642                   | 0.4642                             | 0.4642                                     |
|                 | A2-EaM                  | 100 g dry seed powder    | 5.7830                   | 5.7830                             | 5.7830                                     |
|                 | A2-M                    | 100 g dry seed powder    | 1.3968                   | 1.3968                             | 1.3968                                     |
| EtOH            | CMSE96                  | 200 g dry seed powder    | 18.4246                  | 9.2123                             | 9.2123                                     |
| B1              | B1-H                    | 9 g CME96                | 0.0741                   | 0.8233                             | 0.0758                                     |
|                 | B1-EA                   | 9 g CME96                | 0.2086                   | 2.3178                             | 0.2135                                     |
|                 | B1-M                    | 9 g CME96                | 7.0795                   | 78.6611                            | 7.2465                                     |
| B2              | B2-HEa                  | 9 g CME96                | 0.1089                   | 1.2100                             | 0.1115                                     |
|                 | B2-EA                   | 9 g CME96                | 0.1566                   | 1.7400                             | 0.1603                                     |
|                 | B2-EaM                  | 9 g CME96                | 7.0964                   | 78.8489                            | 7.2638                                     |
|                 | B2-M                    | 9 g CME96                | 0.3550                   | 3.9444                             | 0.3634                                     |

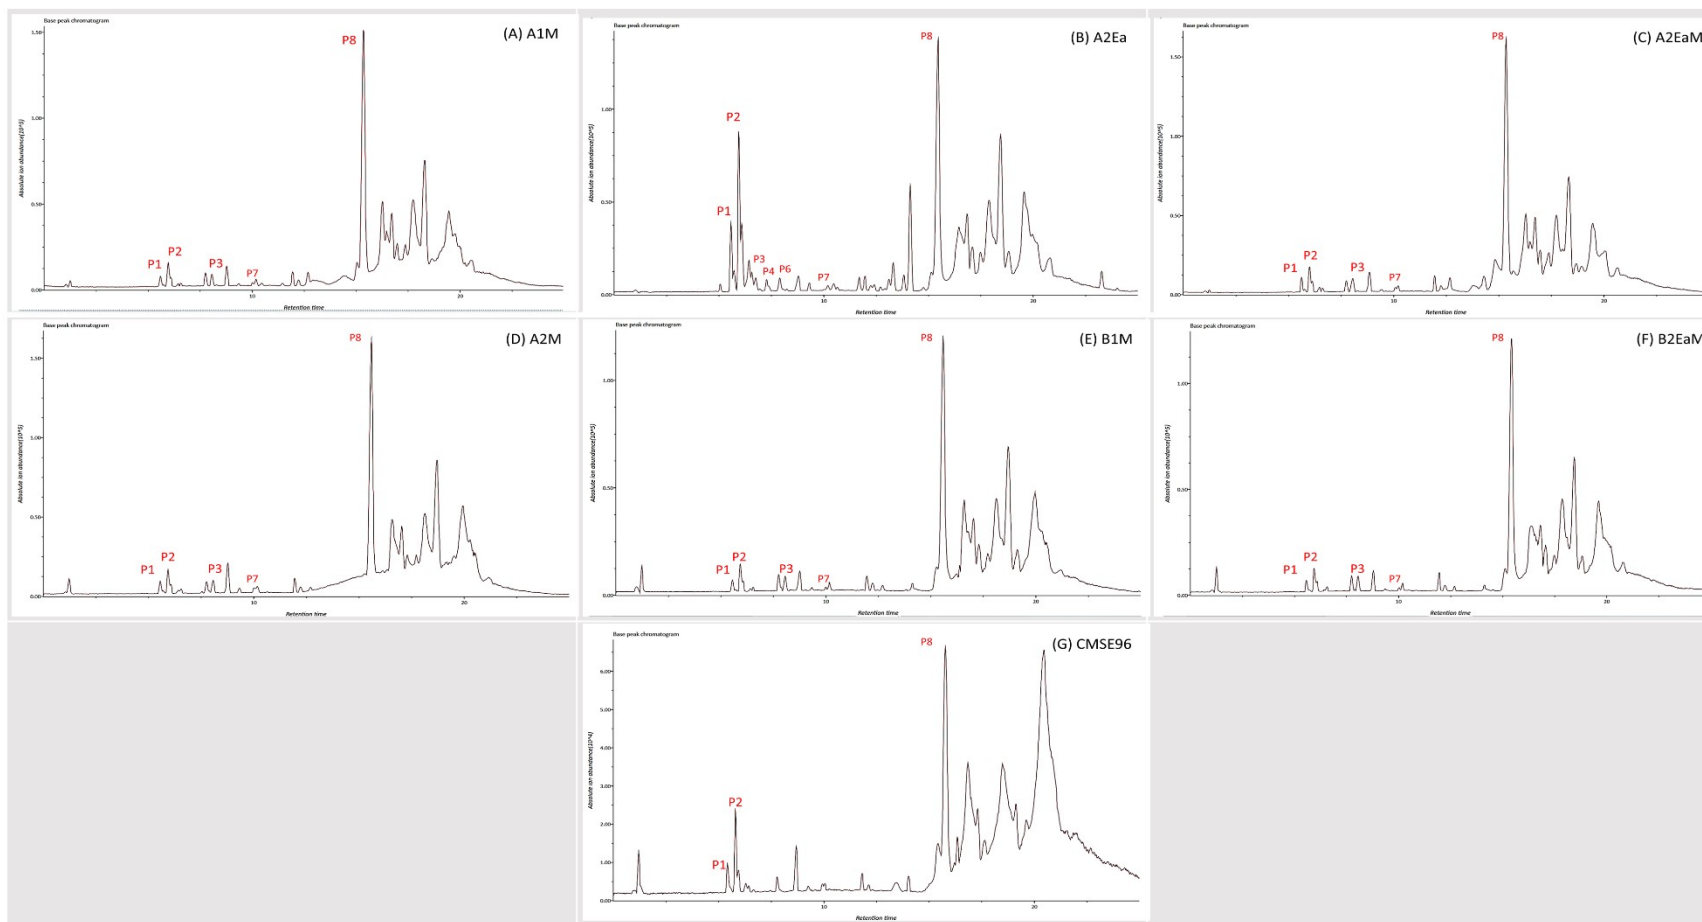

**Figure S1A.** Base peak chromatograms (BPCs) of the seven representative extracts analyzed by LC–MS/MS in negative ion mode. The annotated peaks were tentatively assigned as follows: P1, procyanidin C1; P2, catechin; P3, aromadendrin-O-glucoside; P4, isoquercitrin/quercetin-O-hexoside; P5, astragalins; P6, piceatannol; P7, naringenin; and P8, 6 $\beta$ ,8 $\beta$ -dihydroxyeremophilanolide. All annotations are tentative and were based on accurate precursor ions and MS/MS fragmentation patterns.

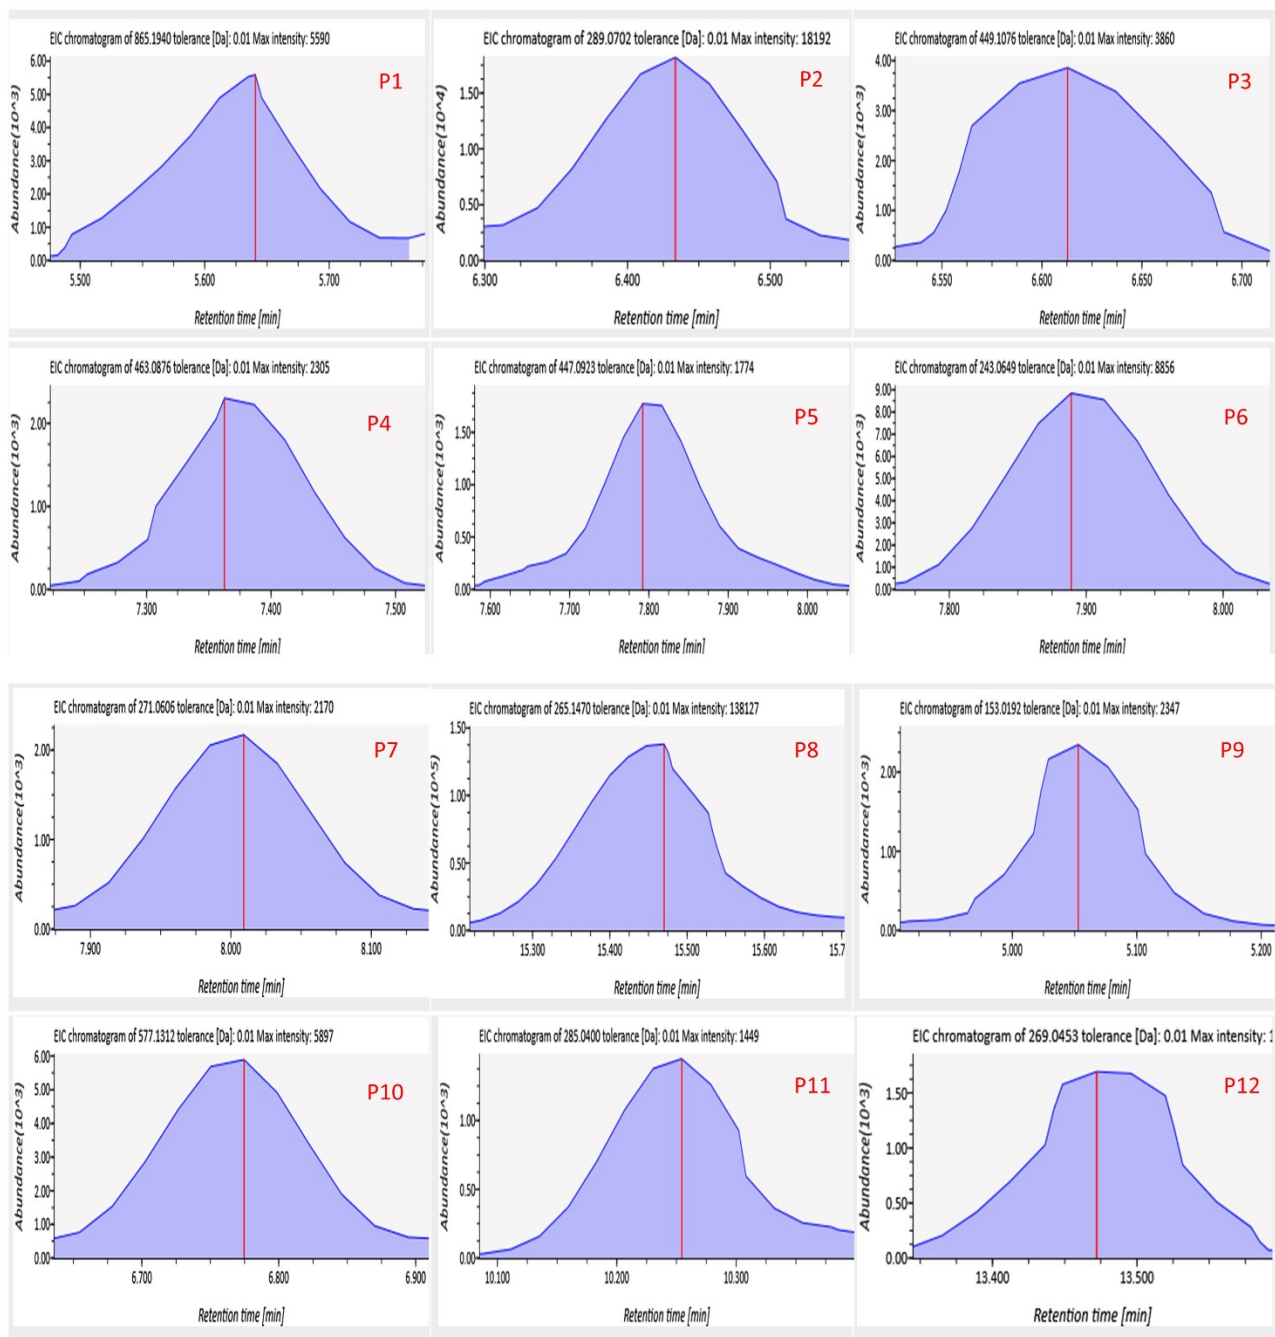

**Figure S1B.** Extracted ion chromatograms (EICs) of twelve representative compounds/features tentatively annotated by LC–MS/MS in negative ion mode. The peaks corresponding to those annotated in Figure S1A were labeled consistently as P1, procyanidin C1; P2, catechin; P3, aromadendrin-O-glucoside; P4, isoquercitrin/querctin-O-hexoside; P5, astragalin; P6, piceatannol; P7, naringenin; and P8, 6 $\beta$ ,8 $\beta$ -dihydroxyeremophilolide. Additional representative EICs were labeled as P9, protocatechuic acid; P10, procyanidin B-type dimer isomer (B2-like); P11, kaempferol; and P12, apigenin. All annotations are tentative and were based on accurate precursor ions and MS/MS fragmentation patterns.

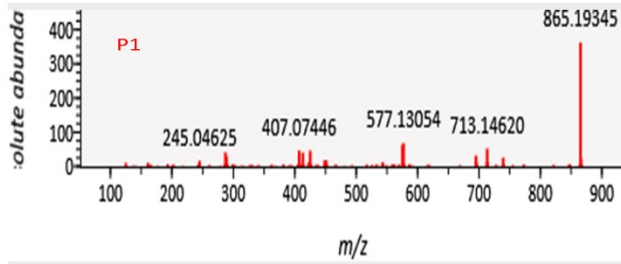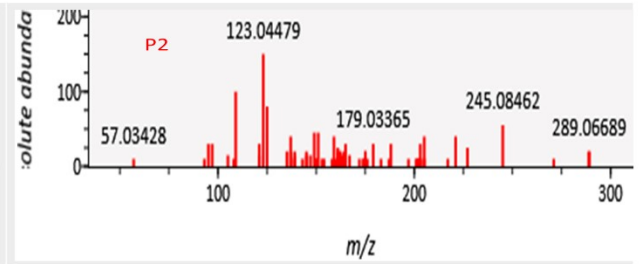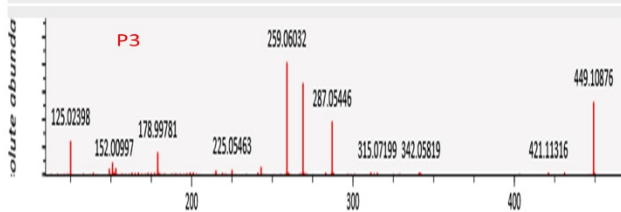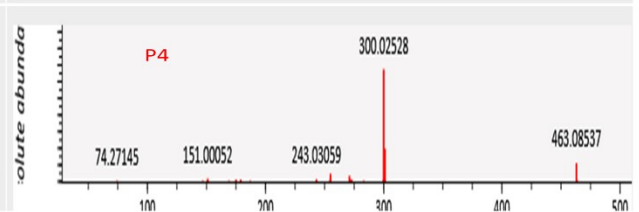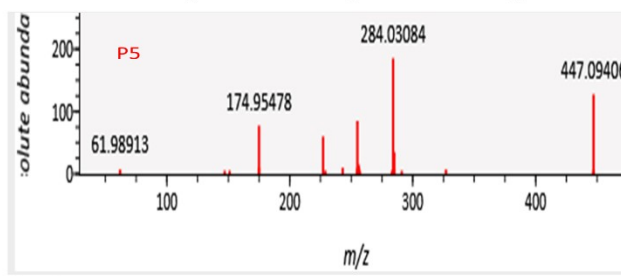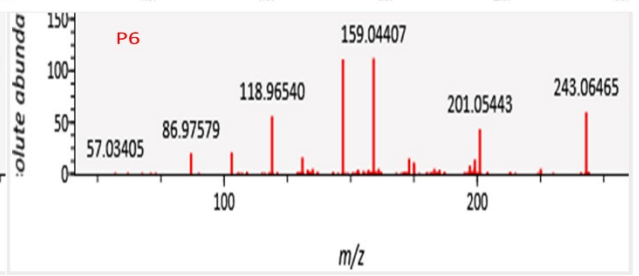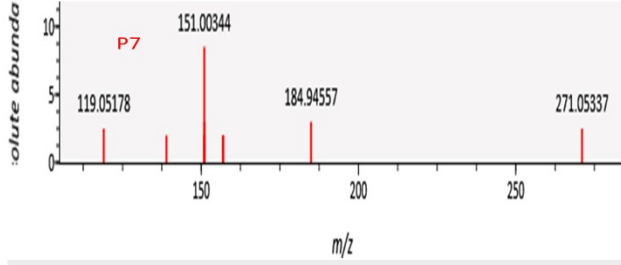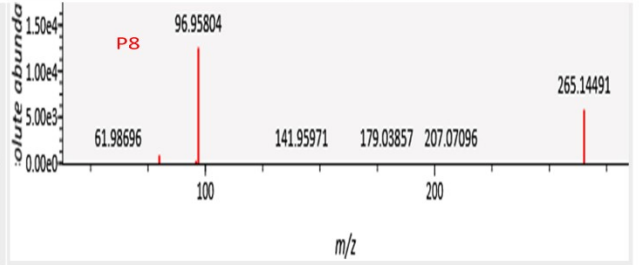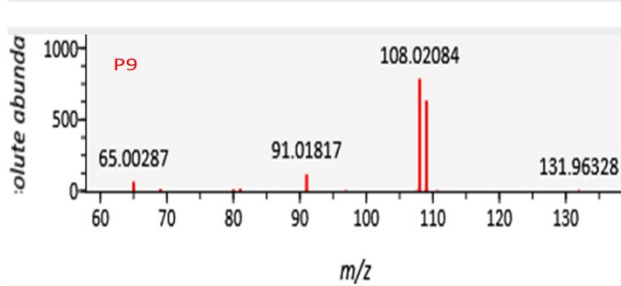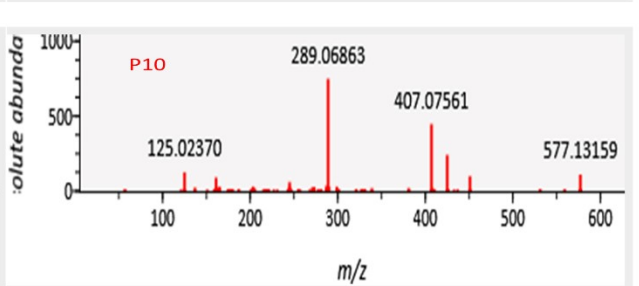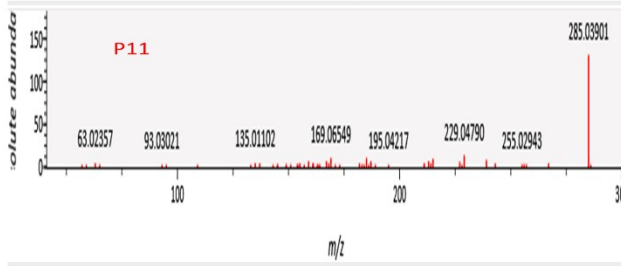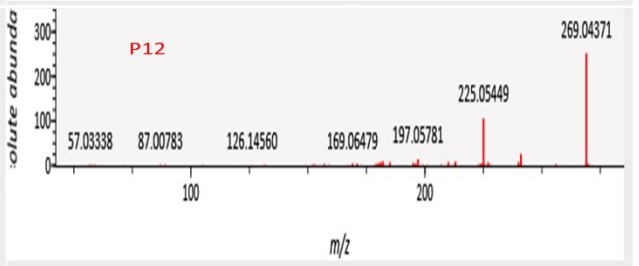

**Figure S2.** Representative MS/MS spectra of the compounds/features shown in Figure S1B. The spectra correspond to P1, procyanidin C1; P2, catechin; P3, aromadendrin-O-glucoside; P4, isoquercitrin/queracetin-O-hexoside; P5, astragalin; P6, piceatannol; P7, naringenin; P8, 6 $\beta$ ,8 $\beta$ -dihydroxyeremophilenolide; P9, protocatechuic acid; P10, procyanidin B-type dimer isomer (B2-like); P11, kaempferol; and P12, apigenin. Diagnostic product ions were annotated to support the tentative LC–MS/MS assignments.
